# Supplementary material for: Urban Noise Pollution Assessment and its Non-Auditory Health Effects on the Residents of Chiniot and Jhang, Punjab, Pakistan
Source: Research Square preprint supplement (doi:10.21203/rs.3.rs-167876/v1), 2021-02-16
Supplement: Supplementary file 1 [file 1f1466e84813973dc9ba2590.docx]

**Urban Noise Pollution Assessment and its Non-Auditory Health Effects on Residents of Chiniot and Jhang, Punjab, Pakistan**

Zia Ur Rahman Farooqi1, Iftikhar Ahmad2, Nukshab Zeeshan1, Predrag Ilic3, Muhammad Imran2,Muhammad Farhan Saeed2

1Institute of Soil and Environmental Sciences, University of Agriculture, Faisalabad-Pakistan

2Department of Environmental Sciences, COMSATS University, Islamabad, Vehari Campus, Vehari 61100, Pakistan

3PSRI Institute for protection and ecology of the Republic of Srpska, Banja Luka, Vidovdanska 43, 78000 Banja Luka, Republic of Srpska, Bosnia and Herzegovina

***Corresponding author:** Iftikhar Ahmad

Department of Environmental Sciences

COMSATS University, Islamabad, Vehari Campus

Vehari, Pakistan

E-mail: [iffises@yahoo.com](mailto:iffises@yahoo.com); [iftikharahmad@cuivehari.edu.pk](mailto:iftikharahmad@cuivehari.edu.pk)

**Supplementary data**

**Table S1:** Noise pollution level and traffic frequency at educational institutes and hospitals of Jhang and Chiniot.

| **Educational institutes of Jhang** | **dB** | **Tf** | **Educational institutes of Chiniot** | **dB** | **Tf** | |
| --- | --- | --- | --- | --- | --- | --- |
| Allied School System | 89 | 2494 | Govt. Islamia High School | 83 | 2046 | |
| Beaconhouse School System | 91 | 2585 | Dar e Arqam School | 83 | 1965 | |
| Garrison School System | 93 | 2365 | The Smart School | 84 | 2143 | |
| The City School | 88 | 2354 | Allied School | 78 | 1705 | |
| Govt. Islamia Higher Secondary School | 78 | 2053 | Oxford Public Model High School | 89 | 1586 | |
| Govt. MB High School | 92 | 2342 | Aisha Memorial Public High School | 91 | 2135 | |
| Faran College | 97 | 2532 | Govt. Girls High School | 75 | 1578 | |
| Govt. Model High School | 74 | 2324 | Govt. Islah High School | 73 | 1487 | |
| Ghazali Pilot Schools | 89 | 2474 | TCF School | 89 | 2376 | |
| Govt. Girls High School | 82 | 2484 | Bright Star Public Model School | 93 | 2586 | |
| Chenab College | 83 | 2354 | Sibling Public School | 81 | 2254 | |
| Lahore College for Women University | 90 | 1547 | Misali Zakariya Science High School | 87 | 2375 | |
| Rachna College of Commerce | 89 | 1426 |  |  |  | |
| Govt. Postgraduate College | 95 | 2135 |  |  |  | |
| Millat College | 98 | 1743 |  |  |  | |
| Saifia Polytechnic Institute | 103 | 2539 |  |  |  | |
| Ghazali College | 77 | 2125 |  |  |  | |
| Vocational Training Institute | 81 | 2134 |  |  |  | |
| **Mean** | **88** | **2222** | **Mean** | **83** | **2019** |
| **Std. Dev.** | **7.80** | **341.8** | **Std. Dev.** | **6.30** | **360.1** |
| **N** | **18** | | **N** | **12** | |
| **Hospitals of Jhang** | | | **Hospitals of Chiniot** | | | |
| Civil Hospital, Gojra Rd | 84 | 3194 | Islamia hospital | 91 | 2975 | |
| District TB Hospital, Gojra Rd | 89 | 3398 | Harral Medical Complex | 86 | 2754 | |
| Faisal Mighiana Memorial Hospital, Gojra Rd | 67 | 1698 | Lillah hospital | 86 | 2857 | |
| Iqbal memorial hospital, Bhakkar Rd | 67 | 1487 | Ali Hospital | 97 | 3086 | |
| Chenab Medicare, Gojra Rd | 56 | 1293 | Khadija Tul Kubra Hospital | 88 | 2576 | |
| Ismail Welfare Hospital, Gojra Rd | 53 | 1496 | Kareem Bibi hospital | 79 | 2543 | |
| Nighat Medical Complex, Gojra Rd | 46 | 1294 | Fazl e Omar Hospital | 90 | 2646 | |
| Rana Hospital, Ayub Chowk | 56 | 1384 | Eesha Medical Centre | 98 | 2675 | |
| Shifa Medical Centre, Civil lines | 46 | 1493 | Pakistan Anti Goiter & Patients Welfare Services | 99 | 3127 | |
| Shahabal Polyclinic, Gojra Rd | 76 | 2032 | DHQ Hospital | 78 | 2453 | |
| **Mean** | **64** | **1877** | **Mean** | **89** | **2769** |
| **Std. Dev.** | **15.2** | **779.7** | **Std. Dev.** | **7.3** | **233.6** |
| **N** | **10** | | **N** | **10** | |

**Table 2S Noise pollution level and traffic frequency at commercial and industrial areas of Jhang and Chiniot**

| **Commercial places of Jhang** | **dB** | **Tf** | **Commercial places of Chiniot** | **dB** | **Tf** | |
| --- | --- | --- | --- | --- | --- | --- |
| Sabz Mandi | 89 | 3497 | Ameen Marbles | 85 | 2254 | |
| Ghalla Mandi | 87 | 3276 | Usmania Hotel | 85 | 2105 | |
| Jhang Bazar | 84 | 3593 | Shahid Ali mujhaid Ali and brothers | 80 | 1734 | |
| Rail Bazar | 86 | 3247 | Azeem Ice Bar & Burger | 120 | 4201 | |
| Anarkali Bazar | 87 | 4294 | SK Peteroleum | 80 | 2950 | |
| Chambeli Market, Near Rail Bazar | 78 | 3138 | Galla Mandi Market plaza | 75 | 2236 | |
|  |  |  | NADRA OFFICE | 70 | 1724 | |
|  |  |  | Lucky Mall | 120 | 3872 | |
|  |  |  | Master Zafar's Handicraft Factory | 107 | 3402 | |
|  |  |  | FFC Office & Warehouse | 78 | 2041 | |
|  |  |  | Hasnain Karyana Store | 111 | 3492 | |
|  |  |  | Daniyal Cooling Center | 72 | 1758 | |
|  |  |  | Sunara Bazart | 78 | 1335 | |
| **Mean** | **85** | **3507** | **Mean** | **89** | **2546** |
| **Std. Dev.** | **3.80** | **420.4** | **Std. Dev.** | **18.28** | **928.3** |
| **N** | **6** | | **N** | **13** | |
| **Industrial area of Jhang** | | | **Industrial area of Chiniot** | | | |
| Hafiz Rice Mills | 98 | 3402 | Janjua Agro-Industry | 78 | 3044 | |
| Umer Usman Surgical Cotton Industry | 81 | 2439 | Madina Group of Industries | 82 | 4241 | |
| Mohsin Ehsan Group of Industries | 87 | 2143 | Bismillah Textiles | 84 | 3042 | |
| Fawad Ghee Industries | 74 | 1587 | Shan Industries | 83 | 2705 | |
| Chadhar Group of Industries | 82 | 1683 | Iqbal Rice Mills | 95 | 3036 | |
| Shakarganj Mills Ltd. | 79 | 1643 | Sohni Dharti Weaving Industries | 88 | 3505 | |
| Zafar Javed Zarai Industries | 85 | 1798 | Kashmir Wood Industries (Pvt) Ltd. | 98 | 3023 | |
| Ittefaq Flour Mills | 95 | 1853 |  |  |  | |
| **Mean** | **85** | **2068** | **Mean** | **86** | **3228** |
| **Std. Dev.** | **8.00** | **609.7** | **Std. Dev.** | **7.20** | **503.9** |
| **N** | **8** | | **N** | **7** | |

**Table S3 Noise pollution level and traffic frequency at traffic intersections of sampling areas in Jhang and Chiniot**

| **Traffic intersections of Jhang** | | **dB** | | **Tf** | | **Traffic intersections of Chiniot** | | **dB** | **Tf** | |
| --- | --- | --- | --- | --- | --- | --- | --- | --- | --- | --- |
| Ayub Chowk | | 95 | | 2684 | | Sargodha Faisalabad Road bypass | | 100 | 3243 | |
| Fowara Chowk | | 93 | | 2594 | | Rajoa Chock | | 100 | 3252 | |
| Rail Bazar Chowk | | 97 | | 3082 | | Tehsil Chowk | | 110 | 4032 | |
| Thana Sadr Chowk | | 95 | | 3135 | | Chock Shaheed | | 115 | 3603 | |
| Abbot Pur Chowk | | 94 | | 2967 | | Nao Gazah Road | | 85 | 3095 | |
| Station Chowk | | 91 | | 3026 | | Salara Road | | 95 | 3349 | |
| Adhiwal Chowk | | 90 | | 2703 | | Riaz Shah Road | | 70 | 2042 | |
| Khokha Chowk | | 102 | | 3406 | | Tibba Kamangran Road | | 70 | 1830 | |
| Nawaz Chowk | | 94 | | 2896 | | Lahore Faisalabad Bypass | | 95 | 2986 | |
| Chiniot More | | 81 | | 2195 | | Salara Chock | | 110 | 3402 | |
| Katchehry Chowk | | 95 | | 3205 | | Umer Road | | 100 | 3198 | |
| Katchehry Rd | | 98 | | 1894 | | Sargodha Road | | 101 | 3894 | |
| Toba Rd | | 75 | | 3255 | | Chiniot Ring Road | | 79 | 1492 | |
| Gojra Rd | | 96 | | 3739 | | Ahmad Yousaf Shaheed Road | | 83 | 2304 | |
| Dhajji Rd | | 73 | | 2020 | | Jogianwala water pump | | 102 | 3014 | |
| Shaheed Rd | | 97 | | 3298 | | Rodian Wala Road | | 78 | 2302 | |
| Kotwali Rd | | 89 | | 3104 | | Main Sargodha Road | | 102 | 3103 | |
| Yousuf Shah Rd | | 95 | | 3082 | |  | |  |  | |
| Sargodha Rd | | 78 | | 3194 | |  | |  |  | |
| Jhang Rd | | 96 | | 2867 | |  | |  |  | |
| Chiniot Rd | | 59 | | 3124 | |  | |  |  | |
| Faisalabad Rd | | 68 | | 2853 | |  | |  |  | |
| Chiniot Rd, Chiniot More | | 76 | | 3395 | |  | |  |  | |
| Satellite Town Rd, Chiniot More | | 65 | | 2840 | |  | |  |  | |
| Faisalabad Rd, Chiniot More | | 72 | | 3031 | |  | |  |  | |
| Jhang Rd, Chiniot More | | 83 | | 3024 | |  | |  |  | |
| Adhiwal, Sargodha Rd | | 78 | | 1985 | |  | |  |  | |
| Daewoo Stand, Jhang Rd | | 89 | | 1793 | |  | |  |  | |
| Purani Chungi | | 78 | | 2042 | |  | |  |  | |
| Lorry Addah, Jhang | | 95 | | 3014 | |  | |  |  | |
| Ganda Toyah | | 83 | | 3103 | |  | |  |  | |
| Faisalabad-Jhang Rd Railway Phatak | | 89 | | 2987 | |  | |  |  | |
| Darul Sakina Rd, Near Satellite Town | | 98 | | 3603 | |  | |  |  | |
| Jhang City Railway Station | | 78 | | 3454 | |  | |  |  | |
| **Mean** | **86** | | **2899** | | **Mean** | | **93** | | | **2949** |
| **Std. Dev.** | **11.0** | | **494.4** | | **Std. Dev.** | | **13.80** | | | **715.1** |
| **N** | **34** | | | | **N** | | **17** | | | |

**Table S4** Noise pollution level and traffic frequency at Residential, Religious and Recreational areas of Jhang and Chiniot.

| **Residential areas of Jhang** | **dB** | **Tf** | **Residential areas of Chiniot** | **dB** | **Tf** |
| --- | --- | --- | --- | --- | --- |
| Rehman Garden, Faisalabad Rd | 55 | 1689 | Satellite Town | 103 | 1643 |
| Madina Town, Jhang Rd | 71 | 1684 | Model Town | 92 | 1456 |
| Satellite Town, Gojra Road | 88 | 2856 | Green Wood Town | 100 | 2332 |
| Chandan Wala Mohallah | 58 | 1475 | Ghafoor Abad | 93 | 2154 |
| Mohallah Hasnana, Jhang | 56 | 1593 | Mohallah Lahori Gate | 88 | 2212 |
| Mohallah Marzi Pura | 61 | 2395 | Rasta Mohallah | 83 | 2521 |
| Pindi Mohallah | 65 | 2353 | Mohallah Peer Shah Burhan | 91 | 1524 |
| Bhabhrana Mohallah | 89 | 2683 | Mohallah Kamangran | 73 | 1531 |
| Budha Mohallah | 83 | 2895 | New Abadi | 78 | 1437 |
| Sheikh Lahori | 77 | 2894 | Mohallah Aali | 82 | 1053 |
| Sultan Wala Mohallah | 89 | 3104 |  |  |  |
| Talab Committee, Jhang | 76 | 2462 |  |  |  |
| Basheer Colony, Hasnana | 75 | 2742 |  |  |  |
| Darbar Mai Chhalla wala, Hasnana | 73 | 2593 |  |  |  |
| Officer Colony | 49 | 1464 |  |  |  |
| Judicial Colony | 54 | 1596 |  |  |  |
| Piplianwala Mohallah | 78 | 2484 |  |  |  |
| Mohallah Burji Wala | 78 | 2693 |  |  |  |
| **Mean** | **70** | **2314** | **Mean** | **88** | **1786** |
| **Std. Dev.** | **12.8** | **565.7** | **Std. Dev.** | **9.40** | **480.4** |
| **N** | **18** | | **N** | **10** | |
| **Religious and Recreational areas of Jhang** | | | **Religious and Recreational areas of Chiniot** | | |
| Jhang Art Gallery | 76 | 1784 | Badshahi Mosque | 80 | 2895 |
| Masjid Haq Nawaz Shaheed | 78 | 2553 | Shalimar Park | 65 | 1498 |
| Majeed Amjid Park, Katchehry Chowk | 62 | 2575 | Chiniot Golf Club | 60 | 1458 |
| Company Bagh | 54 | 1987 | Rao Bagh, Lahore Road | 75 | 1894 |
| Nawaz Shareef Park, Jhang City | 39 | 1864 | Saeen Sukh Shrine | 95 | 3391 |
| Jameel Shaheed Park | 47 | 293 | Hockey Stadium, Satellite town | 91 | 2493 |
| Forest Park | 51 | 757 | Jamia Masjid Noor | 79 | 1462 |
| Darbar Mai Heer | 67 | 2894 | Masjid Siddique-e-Akbar Hanfi | 85 | 2532 |
| Bilal Markaz | 71 | 2153 | Din Garden Chock | 94 | 2403 |
| **Mean** | **60** | **1873** | **Mean** | **80** | **2225** |
| **Std. Dev.** | **13.5** | **854.3** | **Std. Dev.** | **12.3** | **690.5** |
| **N** | **9** | | **N** | **9** | |
